# Supplementary material for: Integrating biological knowledge into variable selection: an empirical Bayes approach with an application in cancer biology
Source: PubMed Central journal article supplement (PMC3503557; doi:10.1186/1471-2105-13-94), 2012-05-11
Supplement: 1471-2105-13-94-S1.pdf [file 1471-2105-13-94-S1.pdf]

# Additional File 1

## Integrating biological knowledge into variable selection: an empirical Bayes approach with an application to cancer biology

Steven M. Hill <sup>1,2,3</sup>, Richard M. Neve <sup>4</sup>, Nora Bayani <sup>5</sup>, Wen-Lin Kuo <sup>5</sup>,  
Safiyah Ziyad <sup>5</sup>, Paul T. Spellman <sup>6</sup>, Joe W. Gray <sup>6</sup> and Sach Mukherjee <sup>1,3,2</sup>

<sup>1</sup>The Netherlands Cancer Institute, 1066 CX Amsterdam, The Netherlands, <sup>2</sup>Centre for Complexity Science and <sup>3</sup>Department of Statistics, University of Warwick, Coventry CV4 7AL, U.K., <sup>4</sup>Genentech Inc., San Francisco, CA 94080, <sup>5</sup>Life Sciences Division, Lawrence Berkeley National Laboratory, Berkeley, CA 94720, <sup>6</sup>Center for Spatial Systems Biomedicine, Oregon Health & Science University, Portland, OR 97239

## 1 Cancer drug response data

### 1.1 Proteins and cell lines

|    |                          |    |                         |    |                                   |
|----|--------------------------|----|-------------------------|----|-----------------------------------|
| 1  | PDK1 (S244)              | 19 | GSK3- $\beta$ (S9)      | 37 | p70S6K- $\alpha$ (T421/S424)      |
| 2  | S6 (S235)                | 20 | HSP27 (S15)             | 38 | p85S6K- $\beta$ (T444/S447)       |
| 3  | ACC (S80)                | 21 | Histone H3 (S10)        | 39 | PRK2 (T816)                       |
| 4  | Adducin- $\alpha$ (S726) | 22 | Histone H3 (S28)        | 40 | AKT1 (S473)                       |
| 5  | Adducin- $\gamma$ (S693) | 23 | IR (Y999)               | 41 | AKT1 (T308) (S729)                |
| 6  | BAD (S99)                | 24 | JNK (T183/Y185)         | 42 | PKC- $\alpha$ (S657)              |
| 7  | BRCA1 (S1497)            | 25 | mTOR (S2448)            | 43 | PKC- $\alpha/\beta$ 2 (T638/T641) |
| 8  | CREB1 (S133)             | 26 | MEK3/6 (S189/S207)      | 44 | PKC- $\epsilon$                   |
| 9  | CDK1/2 (T14/Y15)         | 27 | MNK1 (T209/T214)        | 45 | PKC- $\zeta/\iota$ (T410/T403)    |
| 10 | CDK1/2 (T161/Y160)       | 28 | MEK1 (S297)             | 46 | PP1/Ca (T320)                     |
| 11 | ErbB2 (Y1248)            | 29 | MEK1 (T291)             | 47 | Raf1 (S259)                       |
| 12 | eIF2B- $\epsilon$ (S540) | 30 | MEK1 (T385)             | 48 | RB (S259)                         |
| 13 | Erk1 (T202/Y204)         | 31 | MEK1/2 (S217/S221)      | 49 | RB (S780)                         |
| 14 | FAK (S722)               | 32 | MEK2 (T394)             | 50 | RB (S807/S811)                    |
| 15 | FAK (S910)               | 33 | MAPKAPK2 (T222)         | 51 | SHC1 (Y349/Y350)                  |
| 16 | FAK (Y397)               | 34 | MYPT1 (T696)            | 52 | SRC (Y529)                        |
| 17 | FAK (Y576)               | 35 | NR1 (S896)              |    |                                   |
| 18 | GSK3- $\alpha$ (S21)     | 36 | p70S6K- $\alpha$ (T389) |    |                                   |

Table S1: Phospho-proteins involved in our cancer drug response study.

|    |         |    |             |    |           |
|----|---------|----|-------------|----|-----------|
| 1  | 600MPE  | 13 | HCC38       | 25 | MDAMB436  |
| 2  | AU-565  | 14 | HCC70       | 26 | SK-BR-3   |
| 3  | BT-20   | 15 | Hs587T      | 27 | SUM149PT  |
| 4  | BT-474  | 16 | LY2         | 28 | SUM159PT  |
| 5  | BT-483  | 17 | MCF10A      | 29 | SUM185PT  |
| 6  | BT-549  | 18 | MCF12A      | 30 | SUM225CWN |
| 7  | CAMA-1  | 19 | MCF7        | 31 | SUM52PE   |
| 8  | HCC1143 | 20 | MDAMB134VII | 32 | T-47D     |
| 9  | HCC1187 | 21 | MDMB157     | 33 | UACC-893  |
| 10 | HCC1500 | 22 | MDAMB175    | 34 | ZR-75-1   |
| 11 | HCC1569 | 23 | MDAMB231    | 35 | ZR-75-8   |
| 12 | HCC202  | 24 | MDAMB361    |    |           |

Table S2: Breast cancer cell lines involved in our cancer drug response study.

## 1.2 Proteomics

Cell lysates: For preparation of protein lysates cells were grown to 60-80% confluency in appropriate media (Neve *et al.*, 2006). Cultures were placed on ice, media aspirated and washed in ice cold PBS containing 1mM phenylmethylsulfonyl fluoride (PMSF) and then with a buffer containing 50mM HEPES (pH7.5), 150mM NaCl, 25mM b-glycerophosphate, 25mM NaF, 5mM EGTA, 1mM EDTA, 15mM pyrophosphate, 2mM sodium orthovanadate, 10mM sodium molybdate, leupeptin (10mg/ml), aprotinin (10mg/ml) and 1mM PMSF. Cells were extracted in the same buffer containing 1%Nonidet-P40. Lysates were then clarified by centrifugation and frozen at  $-80^{\circ}\text{C}$ . Protein concentrations were determined using the Bio-Rad protein assay kit. Phosphoproteome analysis was performed at Kinexus (<http://www.kinexus.ca/>) on their KinetWorks<sup>TM</sup> platform.

### 1.3 Sensitivity to range of prior strength parameter $\lambda$

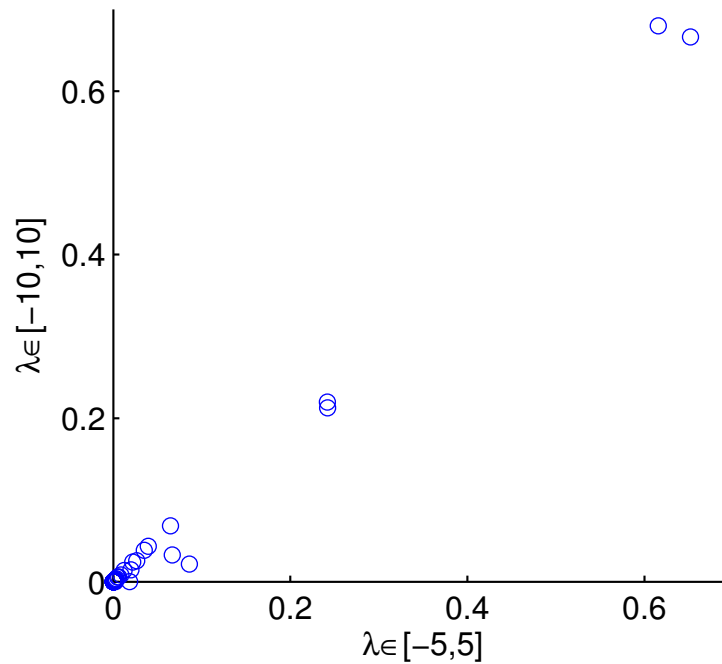

Figure S1: Drug response data; sensitivity to range of prior strength parameter. Posterior inclusion probabilities reported in Figure 7a (Main Text) were obtained using the proposed empirical Bayes approach, with prior strength parameter optimised over the interval  $\lambda \in [-5, 5]$ . These results are compared to those obtained with an increased range of  $\lambda \in [-10, 10]$ .

## References

Neve, R. M. *et al.* (2006). A collection of breast cancer cell lines for the study of functionally distinct cancer subtypes. *Cancer Cell*, **10**, 515–527.
